# Supplementary material
Source: publisher site journal article supplement (https://www.spandidos-publications.com/6742/downloadSupplementary)
Supplement: Supplementary file 1 [file downloadSupplementary]

Table SI. Clinical characteristics for the 40 patients with gastric cancer.

| Characteristic           | n  |
|--------------------------|----|
| Sex                      |    |
| Male                     | 28 |
| Female                   | 12 |
| Age, years               |    |
| ≤60                      | 10 |
| >60                      | 30 |
| Histological type        |    |
| Tubular                  | 23 |
| Papillary                | 3  |
| Mucinous                 | 3  |
| Signet ring cell         | 11 |
| Differentiation          |    |
| Well                     | 2  |
| Middle                   | 25 |
| Poor                     | 13 |
| T stage                  |    |
| Tumor <i>in situ</i> + 1 | 14 |
| 2                        | 8  |
| 3                        | 15 |
| 4                        | 3  |
| N stage                  |    |
| 0                        | 19 |
| 1                        | 9  |
| 2                        | 7  |
| 3                        | 5  |
| M stage                  |    |
| 0                        | 39 |
| 1                        | 1  |
| TNM stage                |    |
| 0 + 1                    | 17 |
| 2                        | 7  |
| 3                        | 15 |
| 4                        | 1  |
| MVI                      |    |
| No                       | 27 |
| Yes                      | 13 |
| Lymphatic invasion       |    |
| No                       | 35 |
| Yes                      | 5  |
| Perineural invasion      |    |
| No                       | 34 |
| Yes                      | 6  |
| CEA, ng/ml               |    |
| ≤5                       | 30 |
| >5                       | 10 |
| CA19-9, U/ml             |    |
| ≤37                      | 28 |
| >37                      | 12 |
| Laurén classification    |    |
| Intestinal               | 26 |
| Diffuse                  | 14 |

MVI, microvascular invasion; CEA, carcinoembryonic antigen; CA19-9, carbohydrate antigen 19-9.
